# Supplementary material
Source: Elsevier journal article supplement (https://www.sciencedirect.com/science/article/pii/S0300893220302943)
Supplement: mmc1 [file S0300893220302943:mmc1.pdf]

**APPENDIX. SUPPLEMENTARY MATERIAL****Table 1 of the supplementary material**

A, Univariate analysis of factors associated with 30-day mortality. B, 30-day mortality or ventricular fibrillation, pulmonary edema, or cardiogenic shock. C, 1-year all-cause mortality in 30-day survivors.

| <b>A</b>                       |                                             |                          |          |
|--------------------------------|---------------------------------------------|--------------------------|----------|
| <b>30-d follow-up</b>          | <b>No 30-d complications<br/>n = 13 770</b> | <b>Death<br/>n = 920</b> | <b>P</b> |
| Female sex                     | 23%                                         | 38%                      | .001     |
| Age, y                         | 62 ± 13                                     | 73 ± 13                  | .001     |
| Diabetes                       | 18%                                         | 28%                      | .001     |
| Smoking                        | 23%                                         | 10%                      | .001     |
| Hypertension                   | 26%                                         | 33%                      | .002     |
| Dyslipidemia                   | 22%                                         | 33%                      | .14      |
| Previous stroke                | 1.35%                                       | 4.6%                     | .001     |
| Killip class I-II              | 94%                                         | 50%                      | .001     |
| SO to ECG, min <sup>a</sup>    | 192 (379)                                   | 216 (401)                | .09      |
| SO to hospital arrival,<br>min | 234 (395)                                   | 264 (432)                | .04      |
| SO to open artery, min         | 319 (438)                                   | 348 (468)                | .1       |
| ECG to open artery, min        | 138 (282)                                   | 142 (110)                | .3       |
| PPCI                           | 91%                                         | 82%                      | .001     |
| Final TIMI 3                   | 94%                                         | 72%                      | .001     |
| 3-vessel disease               | 12%                                         | 22%                      | .001     |
| Left main disease              | 2%                                          | 9%                       | .001     |
| Bleeding                       | 0.8%                                        | 3.7%                     | .001     |

|                             |                                                       |                                                                                                       |          |
|-----------------------------|-------------------------------------------------------|-------------------------------------------------------------------------------------------------------|----------|
| Left bundle branch block    | 0.9%                                                  | 2.7%                                                                                                  | .001     |
| <b>B</b>                    |                                                       |                                                                                                       |          |
| <b>30-d follow-up</b>       | <b>No 30-d complications</b><br><br><b>n = 12 714</b> | <b>Death or</b><br><b>VF/pulmonary</b><br><b>edema/cardiogenic</b><br><b>shock</b><br><b>n = 1976</b> | <b>P</b> |
| Female sex                  | 23%                                                   | 29%                                                                                                   | .001     |
| Age, y                      | 62 ± 13                                               | 66 ± 15                                                                                               | .001     |
| Diabetes                    | 18%                                                   | 22%                                                                                                   | .001     |
| Smoking                     | 23%                                                   | 16%                                                                                                   | .001     |
| Hypertension                | 27%                                                   | 28%                                                                                                   | .49      |
| Dyslipidemia                | 22%                                                   | 22%                                                                                                   | .8       |
| Previous stroke             | 1.32%                                                 | 3%                                                                                                    | .001     |
| Killip class I-II           | 97%                                                   | 55%                                                                                                   | .001     |
| SO to ECG, min              | 197 (383)                                             | 168 (358)                                                                                             | .002     |
| SO to hospital arrival, min | 234 (400)                                             | 216 (384)                                                                                             | .006     |
| SO to open artery, min      | 320 (438)                                             | 348 (467)                                                                                             | .1       |
| ECG to open artery, min     | 136 (282)                                             | 142 (234)                                                                                             | .3       |
| PPCI                        | 91%                                                   | 85%                                                                                                   | .001     |
| Final TIMI 3                | 94%                                                   | 84%                                                                                                   | .001     |
| 3-vessel disease            | 12%                                                   | 19%                                                                                                   | .001     |
| Left main disease           | 2%                                                    | 6%                                                                                                    | .001     |
| Bleeding                    | 0.6%                                                  | 3.5%                                                                                                  | .001     |
| Left bundle branch block    | 0.9%                                                  | 2.6%                                                                                                  | .001     |

| C                                            |                                    |                                  |      |
|----------------------------------------------|------------------------------------|----------------------------------|------|
| 1-y all-cause mortality<br>in 30-d survivors | No 1-y complications<br>n = 13 275 | Death or reinfarction<br>n = 495 | P    |
| Female sex                                   | 23%                                | 30%                              | .001 |
| Age                                          | 62 ± 13                            | 75 ± 13                          | .001 |
| Diabetes                                     | 18%                                | 29%                              | .001 |
| Smoking                                      | 23%                                | 12%                              | .001 |
| Hypertension                                 | 26%                                | 39%                              | .001 |
| Dyslipidemia                                 | 22%                                | 24%                              | .5   |
| Previous stroke                              | 1.1%                               | 6%                               | .001 |
| Killip class I-II                            | 95%                                | 79%                              | .001 |
| SO to ECG, min                               | 190 (374)                          | 262 (499)                        | .002 |
| SO to hospital arrival, min                  | 234 (390)                          | 306 (512)                        | .002 |
| SO to open artery, min                       | 319 (438)                          | 392 (493)                        | .002 |
| ECG to open artery, min                      | 138 (288)                          | 139 (122)                        | .7   |
| PPCI                                         | 91%                                | 88%                              | .008 |
| Final TIMI 3                                 | 94%                                | 90%                              | .003 |
| 3-vessel disease                             | 12%                                | 21%                              | .001 |
| Left main disease                            | 2%                                 | 6%                               | .001 |
| Bleeding                                     | 0.8%                               | 2%                               | .007 |
| Left bundle branch block                     | 0.9%                               | 2.6%                             | .001 |

ECG, electrocardiogram; PPCI, primary percutaneous coronary intervention; SO, symptom onset; TIMI, Thrombolysis in Myocardial Infarction.

Data are expressed as No. (%) or mean ± standard deviation.
